# Supplementary material for: A soft-bodied mollusc with radula from the Middle Cambrian Burgess Shale
Source: Springer Nature journal article supplement (doi:10.1038/nature04894), 2006-07-01
Supplement: 41586_2006_BFnature04894_MOESM1_ESM.pdf [file 41586_2006_BFnature04894_MOESM1_ESM.pdf]

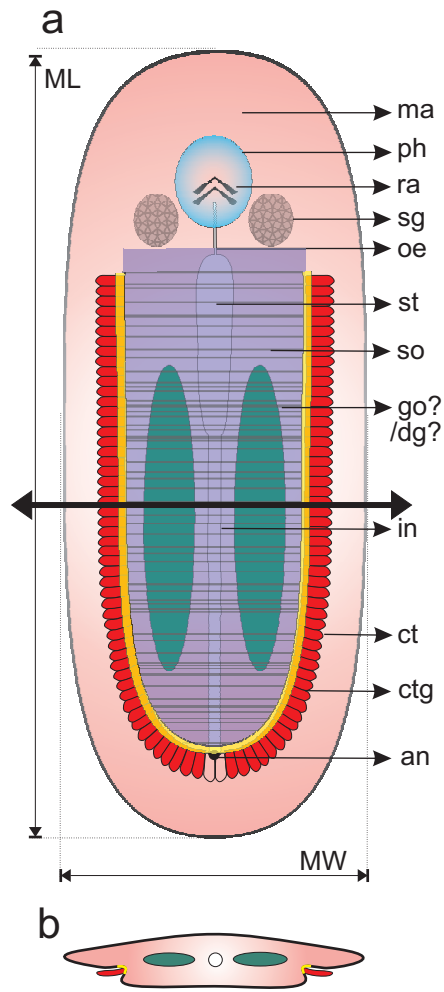

**Supplementary Figure I.** Schematic model of *Odontogriphus omalus*. **a**, dorso-ventral view. **b**, cross section at mid-body level. an=anus, ct=ctenidia, ctg=ctenidia groove, dg?=digestive glands?, go?=gonads?, in=intestine, ma=mantle ML=maximum length, MW= maximum width, oe=esophagus, ph=pharynx and mouth area, ra=radula, sg=salivary glands, so=sole, st=stomach.
