# Supplementary material for: A soft-bodied mollusc with radula from the Middle Cambrian Burgess Shale
Source: Springer Nature journal article supplement (doi:10.1038/nature04894), 2006-07-01
Supplement: 41586_2006_BFnature04894_MOESM3_ESM.pdf [file 41586_2006_BFnature04894_MOESM3_ESM.pdf]

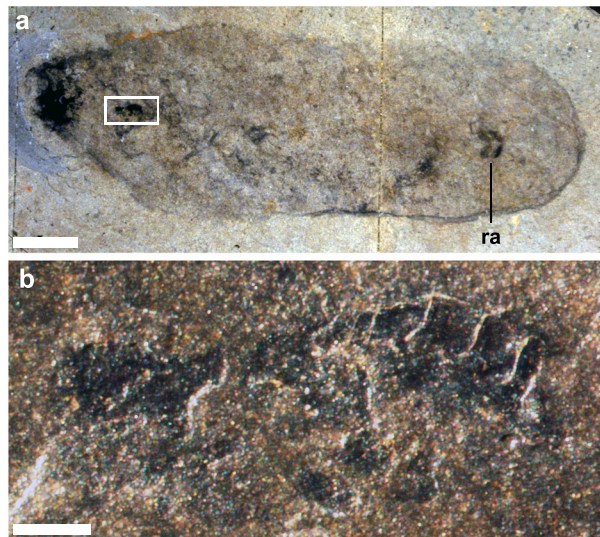

**Supplementary Figure III.** *Odontogriffus omalus* from the Middle Cambrian Burgess Shale, ROM57718. Specimen preserved dorso-ventrally. **a**, overall view, anterior to the right - the presence of a row of teeth inside the gut is emphasized by the white frame; **b** close-up view of the framed area from **a**. Scale bars: 5mm in **a**; 0.5mm in **b**. ra=radula
